# Supplementary material for: 3D printed porous silicone polymer composites using table salt as a sacrificial template
Source: Royal Society of Chemistry journal article supplement (doi:10.1039/d4ma00457d), 2024-01-01
Supplement: d4ma00457d1.pdf [file d4ma00457d1.pdf]

# 3D Printed Porous Silicone Polymer Composites Using Table Salt as a Sacrificial Template

Santosh Adhikari,<sup>\*,1</sup> Xavier M. Torres,<sup>1</sup> John R. Stockdale,<sup>1</sup> Shelbie A. Legett,<sup>1</sup> Lindsey B. Bezek,<sup>1</sup> Jesus A. Guajardo,<sup>1</sup> Adam Pacheco,<sup>1</sup> Karthik Ramasamy,<sup>2</sup> Bart Benedikt,<sup>3</sup> Matthew Lewis<sup>3</sup> and Andrea Labouriau<sup>\*,1</sup>

<sup>1</sup> C-CDE: Chemical Diagnostics and Engineering, Los Alamos National Laboratory, Los Alamos, NM 87545, USA

<sup>2</sup> SIGMA-1: Fabrication Manufacturing Science, Los Alamos National Laboratory, Los Alamos, NM 87545, USA

<sup>3</sup> W-13: Advanced Engineering Analysis, Los Alamos National Laboratory, Los Alamos, NM 87545, USA

\*Correspondence: san\_adh@lanl.gov (S.A.); andrea@lanl.gov (A.L.)

## Supporting Information

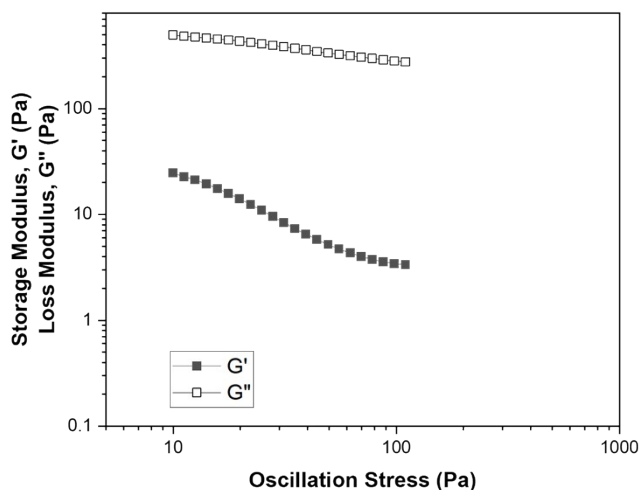

**Figure S1:** Storage and loss moduli as a function of oscillation stress for the grinded resin containing 50wt% of NaCl without filler (Sample P0).

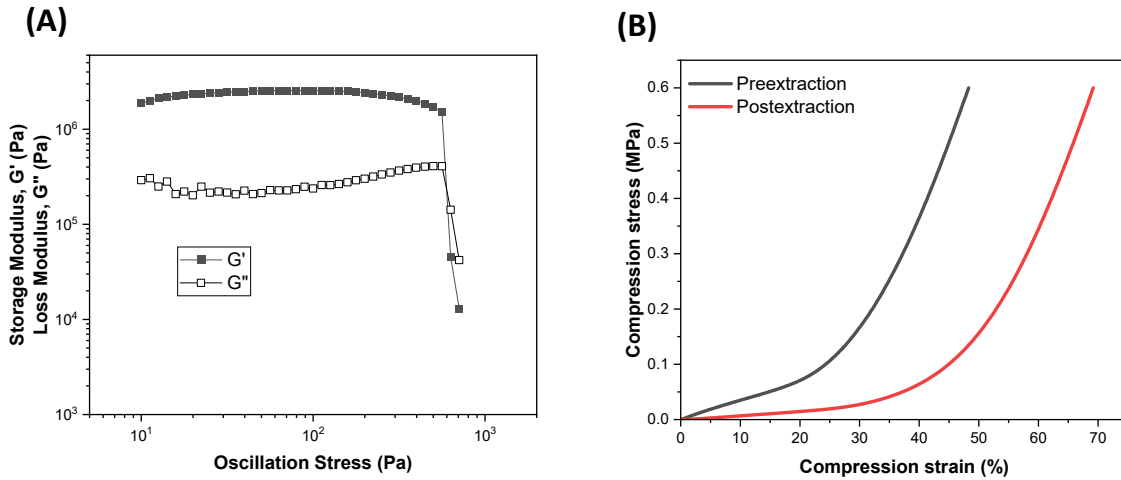

**Figure S2:** (A) Storage and loss moduli as a function of oscillation stress for the hydrogen getter composite resin and (B) Compressive stress strain curves of polymer getter composites before and after extraction of NaCl.

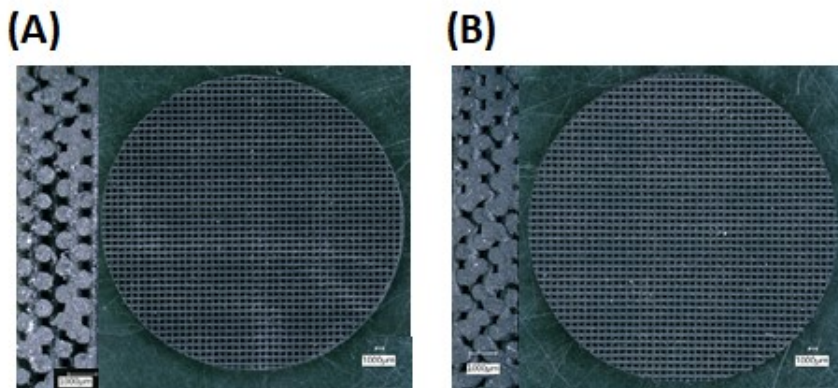

**Figure S3:** Cross-section view (left) and top view (right) of the optical microscope images of FCT pads of polymer getter composite (A) before and (B) after NaCl extraction.

**Table S1:** Summary of the rheology data for different polymer resins.

| Sample | Yield Stress $\sigma_y$ (Pa) | Equilibrium storage modulus $G'_{eq}$ (Pa) | Initial Complex Viscosity (Pa*s) |
|--------|------------------------------|--------------------------------------------|----------------------------------|
| P1     | 7128                         | 371251                                     | 46645                            |
| P2     | 89                           | 37659                                      | 4517                             |
| P3     | 1066                         | 1299600                                    | 172997                           |

**Table S2.** Summary of the mechanical properties of the porous samples (results are average from the two runs)

| Sample      | Tensile test |            | Compressive strain at 0.6 MPa of compressive stress (%) |
|-------------|--------------|------------|---------------------------------------------------------|
|             | Stress (MPa) | Strain (%) |                                                         |
| P1(before)  | -            | -          | 45 ± 2                                                  |
| P2 (before) | -            | -          | 34 ± 3                                                  |
| P3 (before) | -            | -          | 36 ± 4                                                  |
| P1(after)   | 0.52 ± 0.02  | 92 ± 3     | 55 ± 3                                                  |
| P2 (after)  | 0.54 ± 0.05  | 84 ± 5     | 48 ± 6                                                  |
| P3 (after)  | 0.97 ± 0.01  | 83 ± 5     | 53 ± 3                                                  |
| P0(after)   | 0.42 ± 0.06  | 126 ± 10   | -                                                       |

**Table S3.** Change in mass, density, and porosity of polymer getter before and after the extraction of NaCl.

| Sample                   | Mass (g) |       | Change in mass (g) | Change in mass (%) | Density(g/cm <sup>3</sup> ) |        |       | Porosity of 3D printed pads (%) |       | Mass of functional filler (%) |       |
|--------------------------|----------|-------|--------------------|--------------------|-----------------------------|--------|-------|---------------------------------|-------|-------------------------------|-------|
|                          | Before   | After |                    |                    | Bulk                        | Before | After | Before                          | After | Before                        | After |
| Polymer getter composite | 3.056    | 1.535 | 1.521              | 49.8               | 1.412                       | 0.756  | 0.415 | 46                              | 70    | 10                            | 20    |
